# Supplementary material for: Synthesis of sodium silicate from the acid leached calcined kaolinitic clay residue of aluminum sulfate industry
Source: Research Square preprint supplement (doi:10.21203/rs.3.rs-3860849/v1), 2024-01-16
Supplement: Supplementary file 1 [file 0e1a4affdbac79c91688eee5.docx]

**Highlights**

**on the research paper titled:**

**Synthesis of sodium silicate from the Acid leached calcined kaolinitic clay residue of aluminum sulfate industry**

Nabil A. ABDULLAH*, Gamal H. Aboulfotouh*

*Research & Development Dept. of , Aluminum Sulphate Co. of Egypt, [nabilxp9@gmail.com](mailto:nabilxp9@gmail.com)

- Acid leached calcined kaolinitic clay (the residue of alum industry) which is environmentally harmful acid solid waste can be utilized for synthesis of high-modulus sodium silicate.
- The leachate solution resulted from digestion of the acid leached kaolin was reused to prepare high basicity PAC.
- The silica extraction rate from ALCKC reached 88% and the SiO2:nNa2O of the prepared sodium silicate was 1.1 with NaOH–ALCKC ratio of 5:1 at the 20% NaOH at 75°C for 2 h.
- The recovery rate of amorphous silica from alkaline leachate reached 98.62% using sulfuric acid at pH of 7. Then liquid sodium silicate in combination with amorphous silica is used to prepare liquid sodium silicate with a modulus of 3 at 80°C for 3h.
